# Supplementary material for: Health-system drivers influencing the continuum of care linkages for low-birth-weight infants at the different care levels in Ghana
Source: Springer Nature journal article supplement (doi:10.1186/s12887-023-04330-5), 2023-10-05
Supplement: MOESM2 [file 26131932]

## Interview Guide and sociodemographic characteristics (health professionals - hospital)

|                          |  |                           |   |
|--------------------------|--|---------------------------|---|
| Date of Interview:       |  | Place of Interview:       |   |
| Start time:              |  | End time:                 |   |
| Name of Interviewer:     |  | File name/Interview code: | : |
| Position of Interviewee: |  |                           |   |

### Introduction

- Thank participant for participation and time
- Outline aim of the study
- Interview duration approximately 60 minutes
- Ask for open questions/concerns
- Emphasise that questions can be asked at anytime
- Emphasise that participant can choose not to answer any question(s) which makes them feel uncomfortable
- Emphasise that you will ask a question, will listen, not interrupt until participant has finished talking

### Theme: Experiences working with LBW infants and families in the hospital

**Invitation to narrate:** Caring for sick babies can be rewarding but at the same time also very challenging. I am interested in your experiences. Can you tell me how it is for you to provide care for LBW infants here in the MBU?

- Challenges/stressors in the care of LBW infants & their families
- Coping technics to overcome stressors
- Parent/family member involvement (family centred care)
- Expectations from authorities/policies

### Theme: Discharge of LBW infants

**Invitation to narrate:** For parents leaving the hospital with a LBW infant can be a joyous but also a bit of a scary, challenging moment. Can you tell me how a normal discharge process looks like?

- People involved in discharge process (parents/caregivers/health professionals/stakeholders)
- Needs/key topics for parent education/counselling
- Guidelines/standards (national, international)
- Referral system/referral letter
- Networking/collaboration with CHPS zones/community health centres
- Opinion, what challenges parents/family members of LBW infants face after discharge

## Theme: Facilitators/Barriers

**Invitation to narrate:** How is work at the MBU? What works well and where is improvement needed?

- Staff shortage, Supplies, resource allocation
- Coping technics
- Basic/further education/in-service training
- Recommendations for improvements
- Expectations from authorities/policies

## General probes

- Would you tell me how you define it, so I have it in your words?
- That is interesting, can you please tell me more about it?
- If you recall, could you tell me how you learned to handle this xxx
- When you were discussing...can you tell me how that made you feel?"
- You mentioned earlier that...can you explore that in a little more detail?"
- You stated that...can you explain what you meant by that?"
- You said that...how did that affect you?"

## At the end of the interview

- Is there something you like to share which I have not ask you about/we have not discussed so far?
- Is there something you like to ask me?
  
- Thank respondent for his/her time, willingness to participate and sharing his/her knowledge
- Ask respondent if he/she is willing, if required, to be interviewed again at a later stage of the research
  - Yes     No
  
- Ask participants if he/she is interested in the results
  - Yes     No

| Socio demographics                                                 |              |                                                          |                                           |                                         |
|--------------------------------------------------------------------|--------------|----------------------------------------------------------|-------------------------------------------|-----------------------------------------|
| Health professional                                                |              |                                                          |                                           |                                         |
| <b>Age of health professional:</b>                                 | <b>years</b> | <b>Sex:</b>                                              | <b>Female</b><br><input type="checkbox"/> | <b>Male</b><br><input type="checkbox"/> |
| <b>Number of years of working:</b><br>(Total years of working)     | <b>years</b> | <b>Number of years working in this position/ward:</b>    | <b>years</b>                              |                                         |
| <b>Numbers of years working in HMH</b>                             |              | <b>Previous work experiences</b><br>(specify place/date) |                                           |                                         |
| <b>Educational background:</b><br>(specify)                        |              | <b>Year/Place of education:</b><br>(specify place/date)  |                                           |                                         |
| <b>Further education:</b><br>(eg. Special pediatric/Neonatal care) |              | <b>Year/Place of education:</b><br>(specify place/date)  |                                           |                                         |
