# Supplementary material for: Health-system drivers influencing the continuum of care linkages for low-birth-weight infants at the different care levels in Ghana
Source: Springer Nature journal article supplement (doi:10.1186/s12887-023-04330-5), 2023-10-05
Supplement: MOESM3 [file 26131932]

**Interview Guide and sociodemographic characteristics (Health professionals - community level)**

|                                 |  |                           |  |        |  |
|---------------------------------|--|---------------------------|--|--------|--|
| Date of Interview:              |  | Place of Interview:       |  | Urban: |  |
| Start time:                     |  | End time:                 |  | Rural: |  |
| Name of Interviewer:            |  | File name/Interview code: |  | :      |  |
| Position of health professional |  | :                         |  |        |  |

**Introduction**

- Thank participant for participation and time
- Outline aim of study
- Interview duration approximately 60 minutes
- Ask for open questions/concerns
- Emphasise that participant can choose not to answer any question(s) which makes them feel uncomfortable
- Emphasise that you will ask a question, will listen, not interrupt until participant has finished talking

**Theme: Experiences working with LBW infants and families in the community**

**Invitation to narrate:** Caring for sick and small babies can be rewarding but at the same time also very challenging. I am interested in your experiences. Can you tell me how it is for you to provide care for LBW infants here in this community?

- Typical tasks in the care of LBW infants
- Challenges/stressors in the care of LBW infants & their families
- Parent/family member involvement (family centred care)
- Health professionals/Stakeholder involvement
- Needs/wishes from health professional

**Theme: Referral system**

**Invitation to narrate:** When LBW infants come home, they may fall sick or need routine follow up care.. Can you tell me how you get to know that you have a LBW infant (from the HMH) in your community?

- Function of referral system/referral letter
- People involved in discharge process
- Guidelines/standards (local, international)
- Network/collaboration with Hohoe Municipal hospital (higher level facility)
- Opinion, what challenges parents/caregivers of LBW face after discharge

## Theme: Facilitators/Barriers

**Invitation to narrate:** How is it to work as a nurse/ midwife in this community? What works well, where is improvement needed?

- Staff shortage, Supplies, resource allocation
- Coping technics
- Needs
- Expectations from authorities/policies
- Basic/further education/in-service training
- Recommendations for improvements

## Probing Questions

- That is interesting, can you please tell me more about it?
- If you recall, could you tell me how you learned to handle this xxx
- Would you tell me how you define it, so I have it in your words?
- When you were discussing..... can you tell me how that made you feel?"
- You mentioned earlier that..... can you explore that in a little more detail?"
- You stated that.....can you explain what you meant by that?"
- You said that.....how did that affect you?"

## Theme: At the end of the interview

- Is there something you like to share which I have not ask you about/we have not discussed so far?
- Is there something you like to ask me?
  
- Thank respondent for his/her time, willingness to participate and sharing his/her knowledge
- Ask respondent if he/she is willing, if required, to be interviewed again at a later stage of the research
  - Yes     No
  
- Ask participants if he/she is interested in the results
  - Yes     No

| Socio demographics                                                 |              |                                                       |                                           |                                         |
|--------------------------------------------------------------------|--------------|-------------------------------------------------------|-------------------------------------------|-----------------------------------------|
| Health Professional                                                |              |                                                       |                                           |                                         |
| <b>Age of health professional:</b><br>(thick appropriate box)      | <b>years</b> | <b>Sex:</b>                                           | <b>Female</b><br><input type="checkbox"/> | <b>Male</b><br><input type="checkbox"/> |
| <b>Number of years of working:</b><br>(Total years of working)     | <b>years</b> | <b>Number of years working in this position/ward:</b> | <b>years</b>                              |                                         |
| <b>Numbers of years working in HMH</b><br>(specify place/years)    |              | <b>Previous work experiences</b>                      |                                           |                                         |
| <b>Educational background</b><br>(specify)                         |              | <b>Year/Place of education</b><br>(specify)           |                                           |                                         |
| <b>Further education</b><br>(e.g special paediatric/neonatal care) |              | <b>Year/place of education:</b>                       |                                           |                                         |
